# Supplementary material
Source: PubMed Central journal article supplement (PMC3351332)
Supplement: supp_M111.333781_jbc.M111.333781-1.pdf [file supp_M111.333781_jbc.M111.333781-1.pdf]

**Supplementary Materials for**

**1,3-1,4- $\alpha$ -L-Fucosynthase that specifically introduces Lewis a/x antigens into  
type-1/2 chains**

Sakurama *et al.*

**Table S1.** Hydrolysis of 3-fucosyllactose (3-FL) and pNP-Fuc by *BbAfcB* variants

| Enzyme                          | Specific activity <sup>a</sup> (mU/mg) |                   |
|---------------------------------|----------------------------------------|-------------------|
|                                 | 3-FL                                   | pNP-Fuc           |
| WT                              | 5,100                                  | 0.18              |
| <i>Nucleophile mutants</i>      |                                        |                   |
| D703A                           | 0.032                                  | n.d. <sup>b</sup> |
| D703C                           | 0.11                                   | n.d.              |
| D703G                           | 0.30                                   | n.d.              |
| D703S                           | 0.067                                  | n.d.              |
| <i>Acid/base mutant</i>         |                                        |                   |
| E746A                           | 0.74                                   | n.d.              |
| <i>Gal-binding site mutants</i> |                                        |                   |
| W742A                           | 2.8                                    | 0.043             |
| D807A                           | 64                                     | 0.080             |
| <i>Disordered loop mutants</i>  |                                        |                   |
| D763A                           | 1,500                                  | 0.17              |
| D766A                           | 1,600                                  | 0.15              |
| D778A                           | 1,900                                  | 0.16              |

<sup>a</sup>Only the specific activities were determined because the kinetic parameters could not be calculated due to the linear increase of the initial velocity up to 20 mM of the substrate.

<sup>b</sup>not determined.

For the hydrolysis of 3-FL, the WT enzyme (14 nM) and its mutants [D703 mutants (12 μM), W742A and E746A (17 μM), D763A and D778A (44 nM), D766A (14 nM), D807A (890 nM)] were incubated in reaction mixtures (40 μl) consisting of 100 mM MOPS buffer (pH 6.5) and 1 mM substrate at 30°C. The amounts of the liberated Fuc were determined using a fucose dehydrogenase-coupled method (23).

For the hydrolysis of pNP-Fuc, the enzymes (17 μM) were incubated in reaction mixtures (40 μl) consisting of 100 mM MOPS buffer (pH 6.5) and 1 mM substrate at 30°C. The amount of the liberated pNP was determined by measuring absorbance at 405 nm.

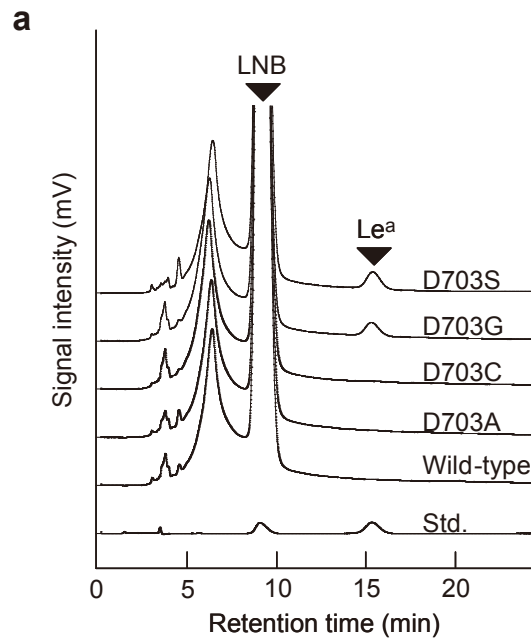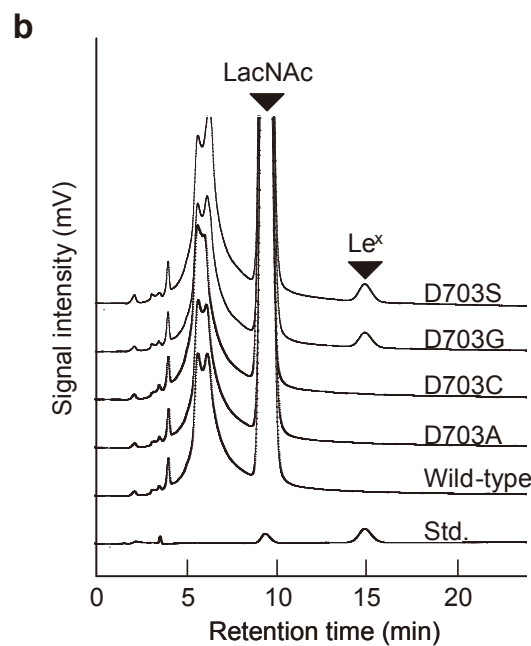

**Figure S1.** Syntheses of Le<sup>a</sup> (a) and Le<sup>x</sup> (b) trisaccharides by the *BbAfcB* D703 mutants. The WT enzyme and D703 mutants (17  $\mu$ M) were incubated in the reaction mixtures (50  $\mu$ l) consisting of 100 mM MOPS (pH 7.0), 20 mM FucF (donor) and 100 mM LNB (a) or LacNAc (b) (acceptor) for 10 min at 30°C. The reaction products were analyzed by HPLC-UV detection. Standard sugars (Std.) are: lacto-*N*-biose I (LNB), *N*-acetyllactosamine (LacNAc), Lewis a (Le<sup>a</sup>) and Lewis x (Le<sup>x</sup>).

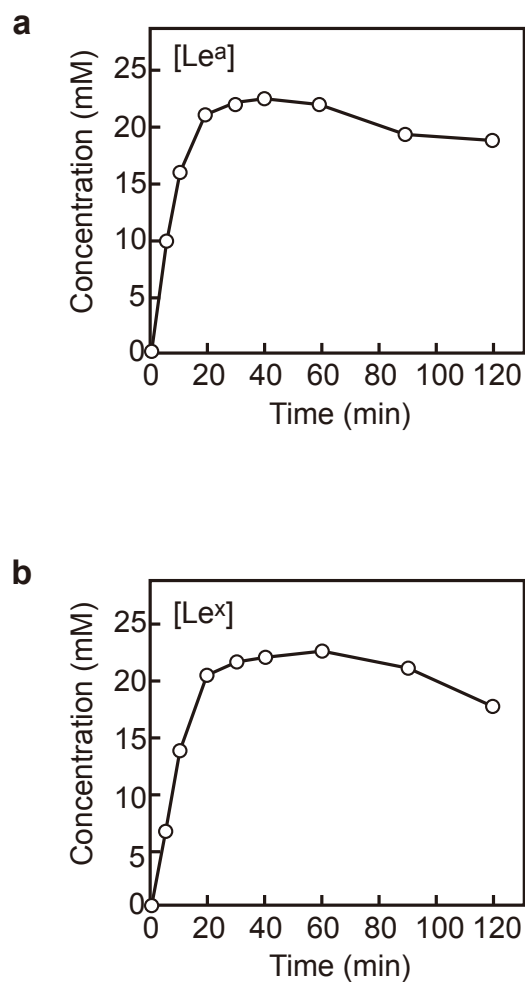

**Figure S2.** Time courses of the Le<sup>a</sup> (a) and Le<sup>x</sup> (b) syntheses catalyzed by the *BbAfcB* D703S mutant. (a) The reaction was carried out in 100 mM MES buffer (pH 5.0) containing 40 mM FucF and 200 mM LNB for 120 min at 30°C in the presence of the D703S mutant (17 μM). (b) A similar reaction was carried out for the synthesis of Le<sup>x</sup>, except that 100 mM LacNAc was used. Aliquots were taken at the indicated times and analyzed by HPLC-CAD.

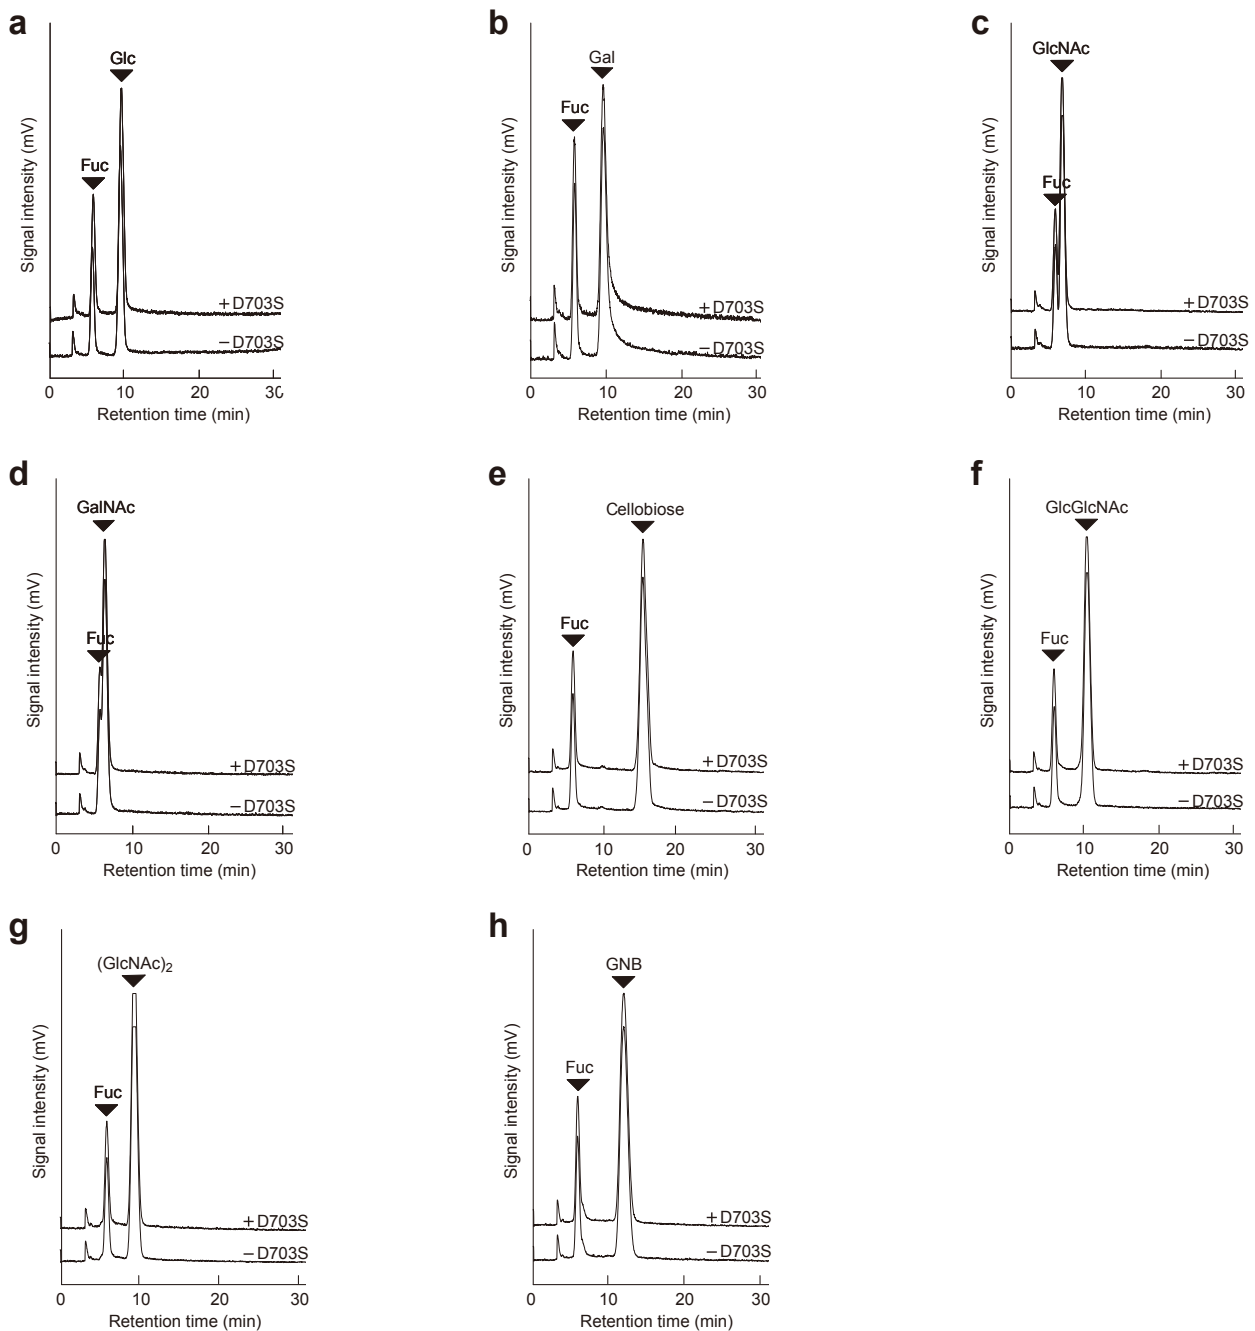

**Figure S3.** The acceptor specificity of the *BbAfcB* D703S glycosynthase. The reaction was carried out in 100 mM MES buffer (pH 5.0) containing 40 mM FucF and 100 mM of each acceptor for 40 min at 30°C in the presence and absence of the enzyme (17  $\mu$ M). The reaction products were analyzed by HPLC-CAD. The acceptors used were: Glc (**a**), Gal (**b**), GlcNAc (**c**), GalNAc (**d**), cellobiose (**e**), 2-acetamide-2-deoxy-4-O-( $\beta$ -glucosyl)-glucose (GlcGlcNAc) (**f**), *N,N'*-diacetylchitobiose [(GlcNAc)<sub>2</sub>] (**g**) and galacto-*N*-biose (GNB) (**h**). The peaks of Fuc and acceptor are indicated.

**a**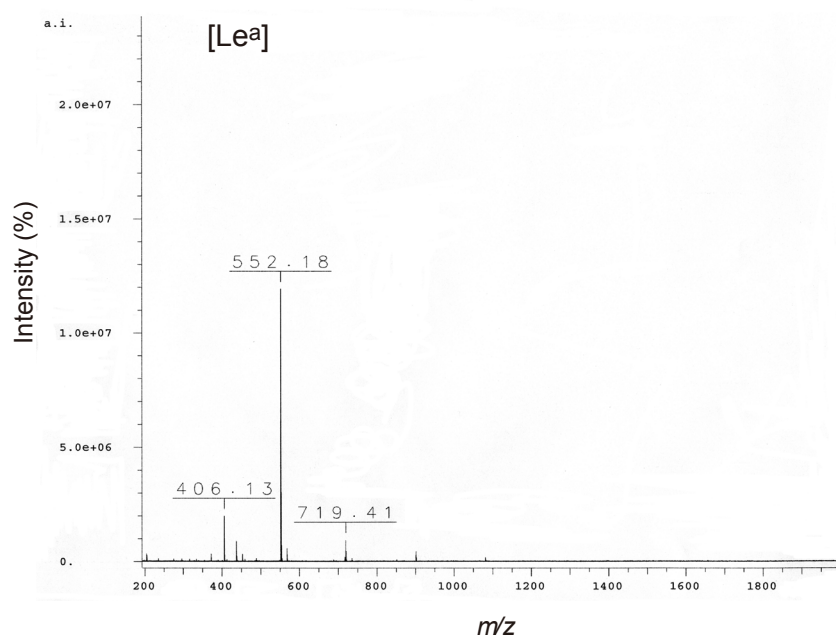**b**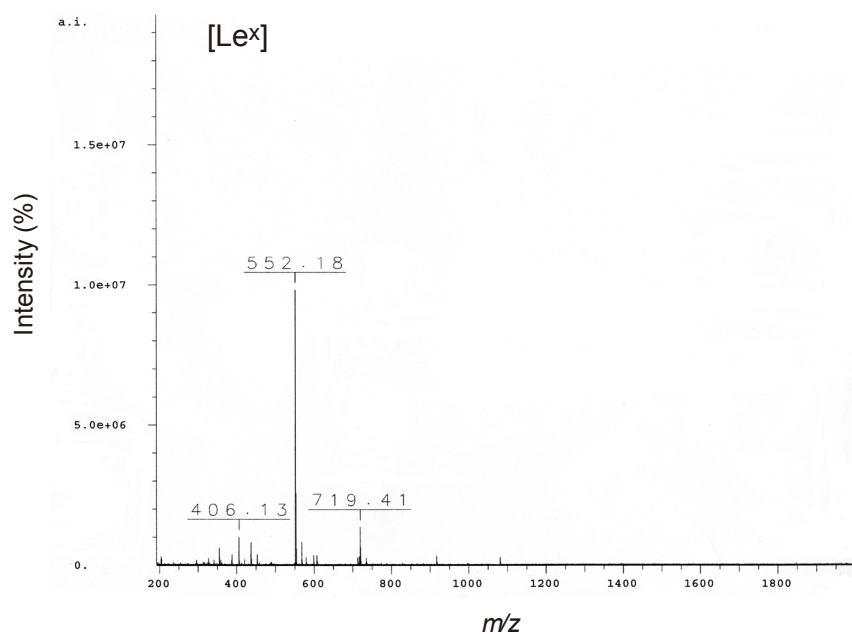

**Figure S4.** ESI-MS analysis of the purified products (Le<sup>a</sup> and Le<sup>x</sup>). The syntheses of Le<sup>a</sup> (**a**) and Le<sup>x</sup> (**b**) trisaccharides were performed as described in the legend of **Figure 1**. The products were purified and subjected to ESI-MS analysis (calculated for the sodium adduct [M+Na]<sup>+</sup> 552.19, observed 552.18).

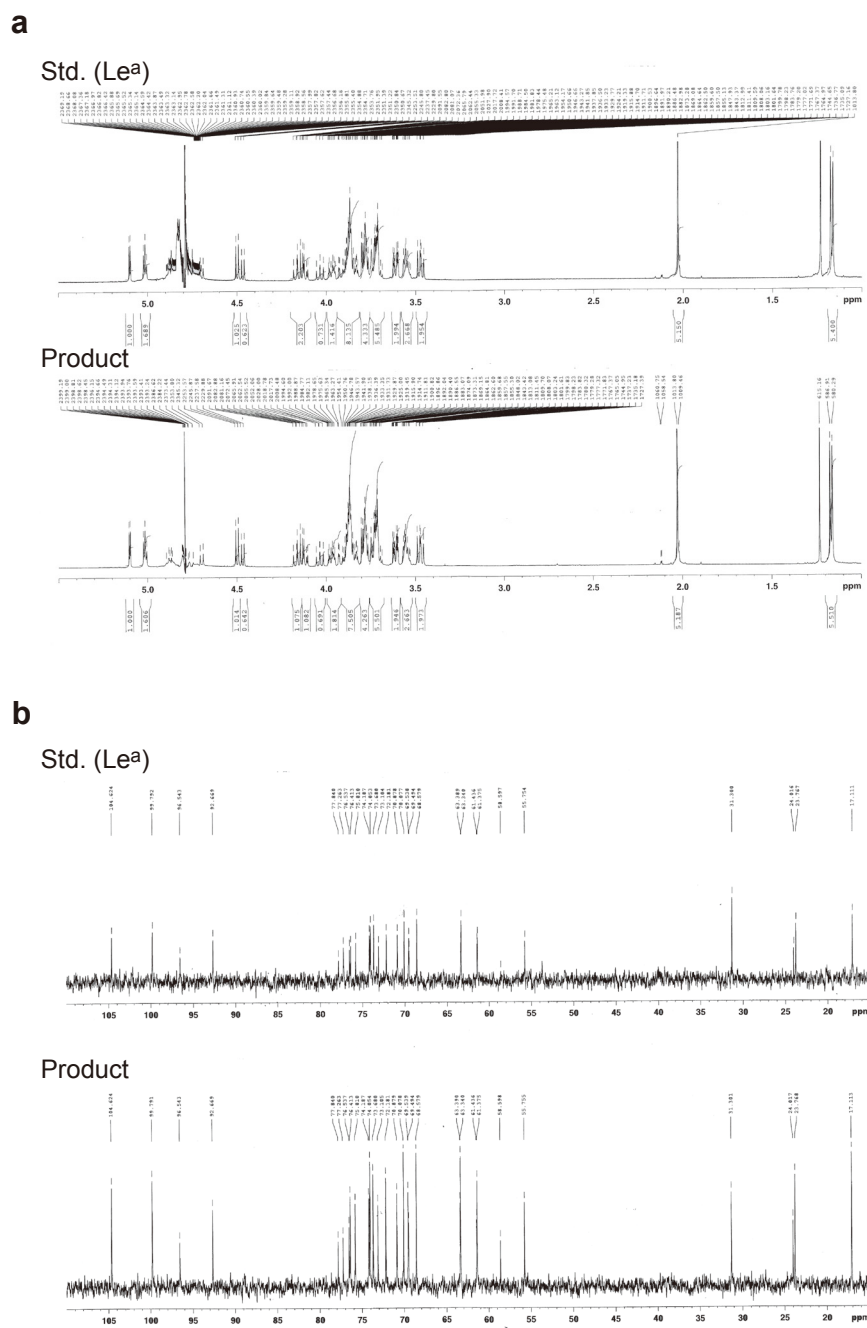

**Figure S5.** NMR analysis of the purified product (Le<sup>a</sup>). The <sup>1</sup>H (a) and <sup>13</sup>C (b) NMR spectra of the purified product (lower panels) were compared with those of the authentic Le<sup>a</sup> (upper panels). The spectra were measured in D<sub>2</sub>O using 2-methyl-2-propanol as the internal standard.

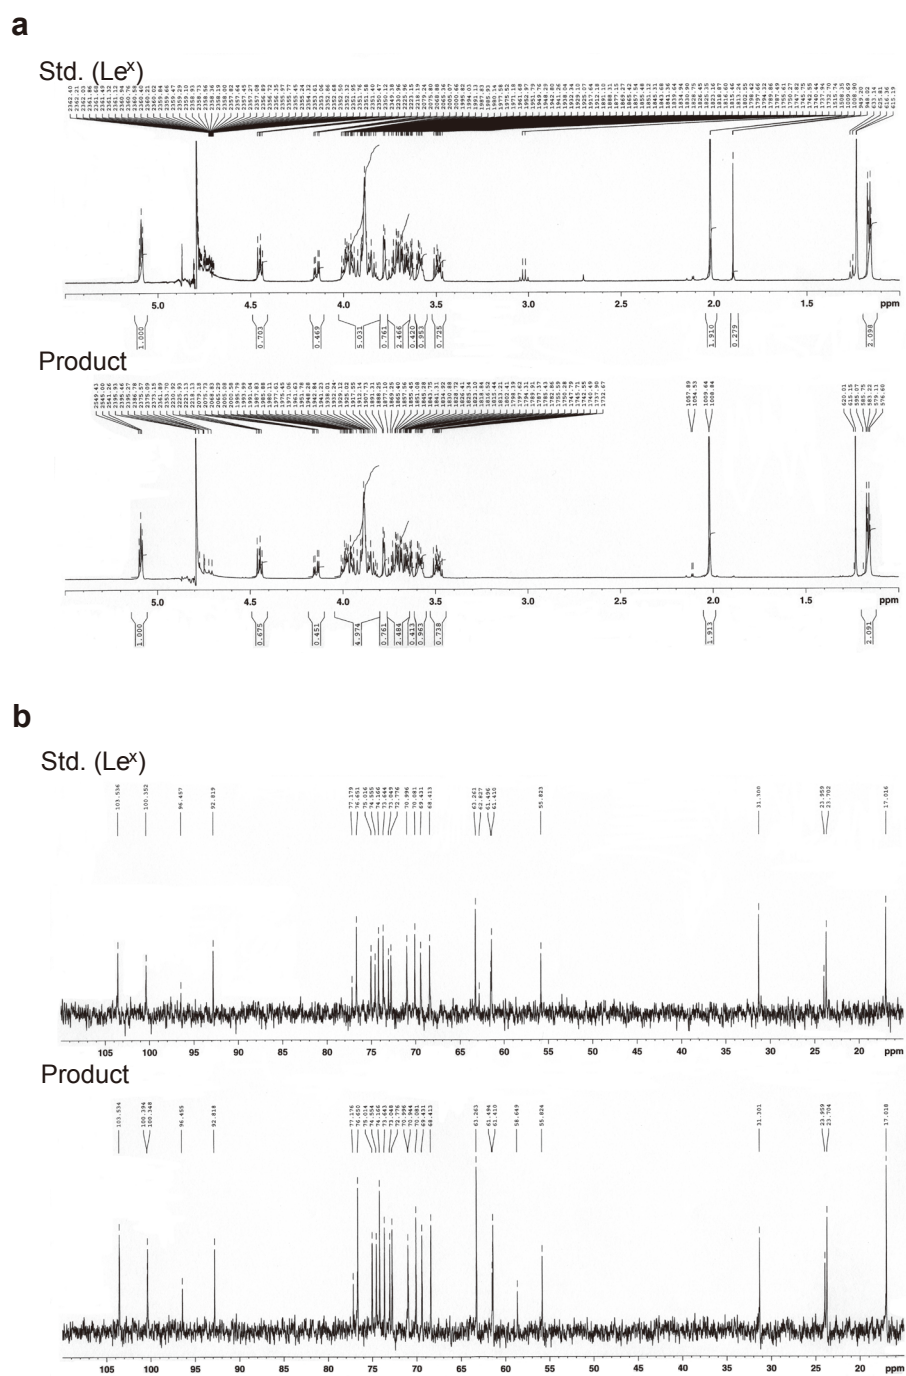

**Figure S6.** NMR analysis of the purified product (Le<sup>x</sup>). The <sup>1</sup>H (**a**) and <sup>13</sup>C (**b**) NMR spectra of the purified product (lower panels) were compared with those of the authentic Le<sup>x</sup> (upper panels). The spectra were measured in D<sub>2</sub>O using 2-methyl-2-propanol as the internal standard.



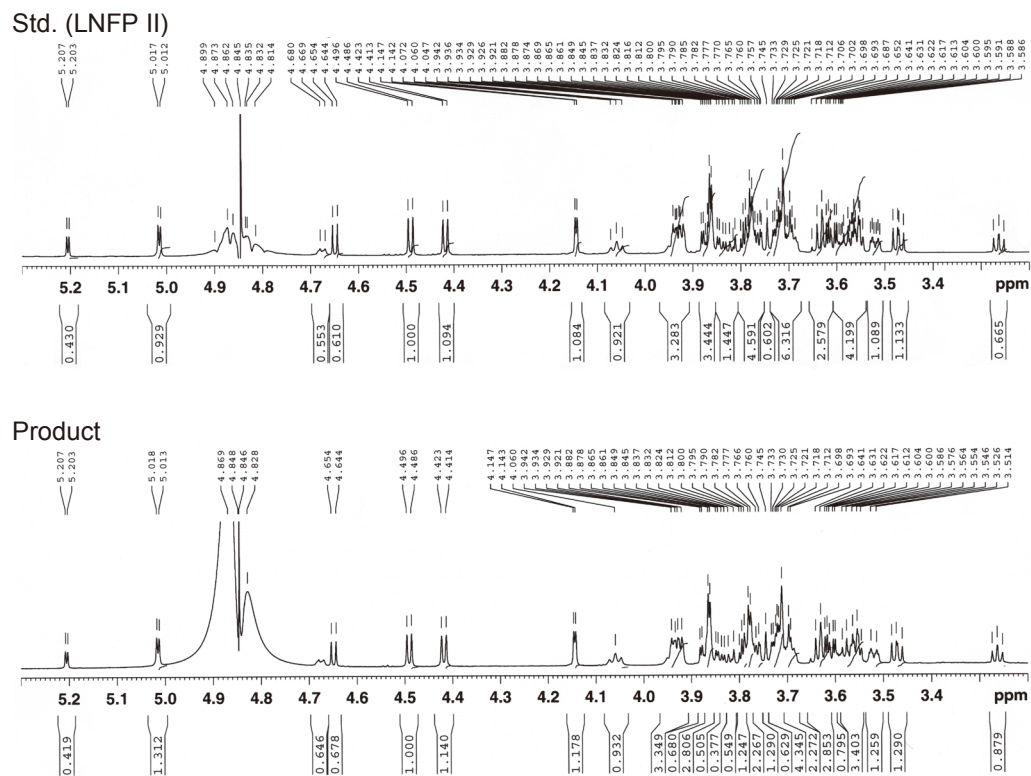

**Figure S7.**  $^1\text{H}$  NMR analysis of the purified product (LNFP II). The reaction was carried out in 100 mM MES buffer (pH 5.0) containing 40 mM FucF and 100 mM LNT at 30°C in the presence of 17  $\mu\text{M}$  D703S. The spectra were obtained in  $\text{D}_2\text{O}$  using 2-methyl-2-propanol as the internal standard. Upper panel, authentic LNFP II; lower panel, purified product.

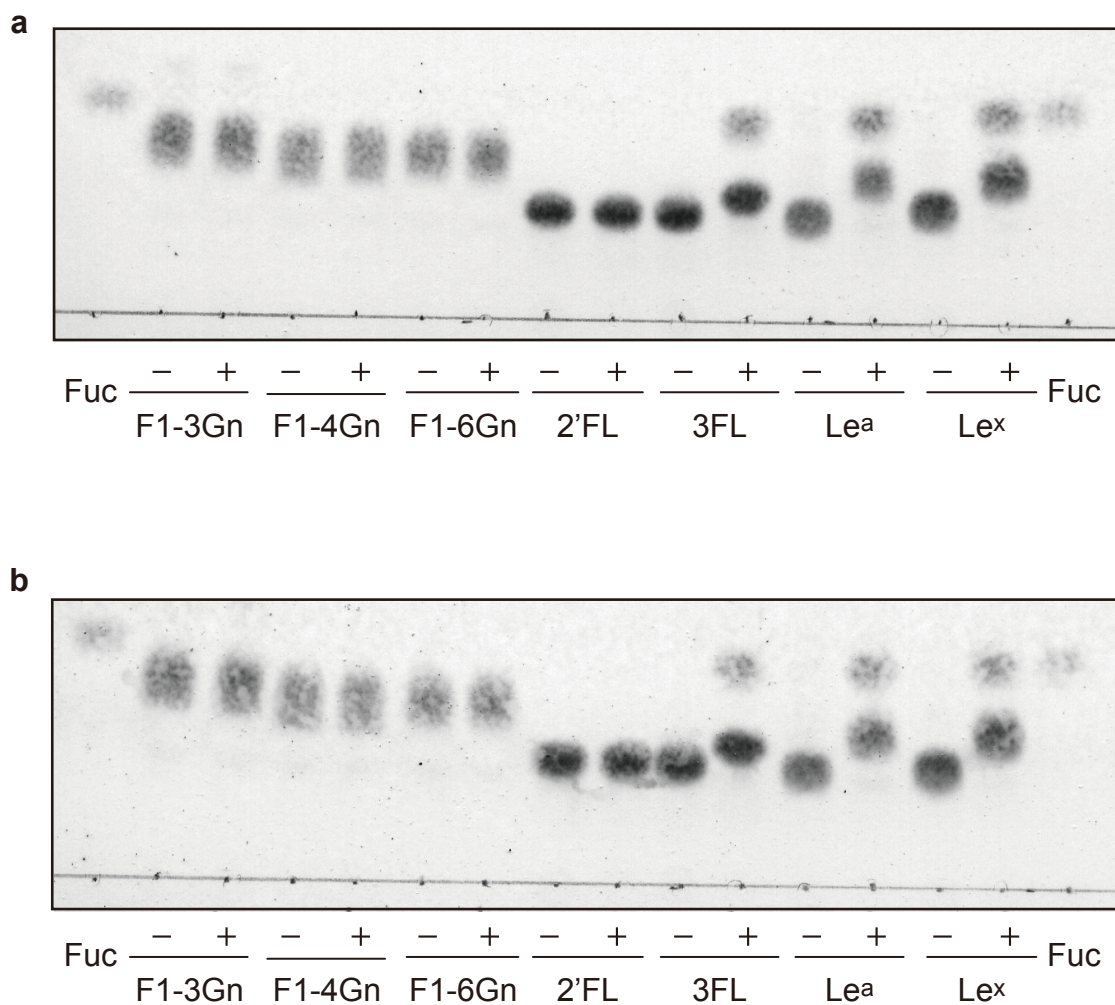

**Figure S8.** Substrate specificities of *BbAfcB* (a) and *BiAfcB* (b). The reactions were carried out in 100 mM MOPS buffer (pH 6.5) containing 6 mM substrates at 30°C for 60 min in the presence and absence of the enzyme (*BbAfcB*; 1.1  $\mu$ M, *BiAfcB*; 0.47  $\mu$ M). The reaction products were analyzed by TLC (Silica Gel 60, Merck) using a solvent system of 1-butanol/acetic acid/water (2:1:1, by volume). The sugars were visualized as described previously (Ashida, H., Miyake, A., Kiyohara, M., Wada, J., Yoshida, E., Kumagai, H., Katayama, T., and Yamamoto, K. (2009). *Glycobiology* **19**, 1010-1017). The substrates used were: Fuc $\alpha$ 1-3GlcNAc (F1-3Gn), Fuc $\alpha$ 1-4GlcNAc (F1-4Gn), Fuc $\alpha$ 1-6GlcNAc (F1-6Gn), 2'-fucosyllactose (2'-FL), 3-fucosyllactose (3-FL), Lewis a (Le<sup>a</sup>) and Lewis x (Le<sup>x</sup>).

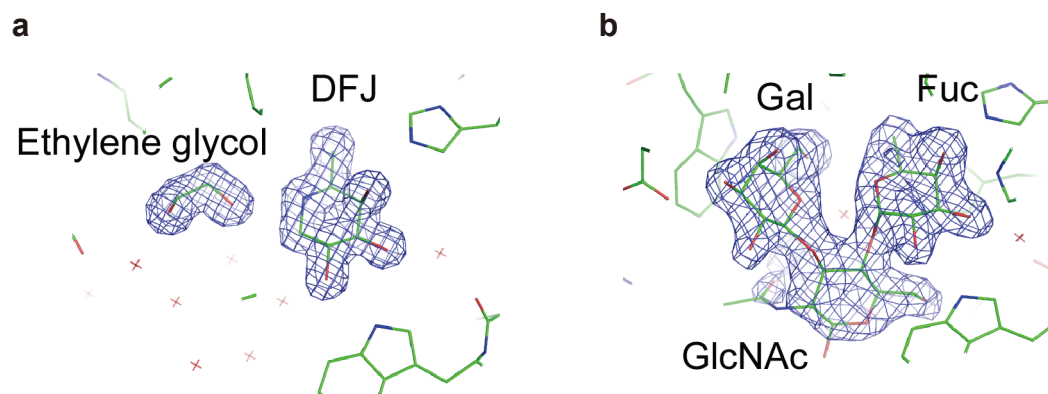

**Figure S9.**  $|F_o| - |F_c|$  omit electron density maps of WT-DFJ-EG (a) and D172A/E217A-LNFP II (b) complex. The maps were contoured at  $3\sigma$ .

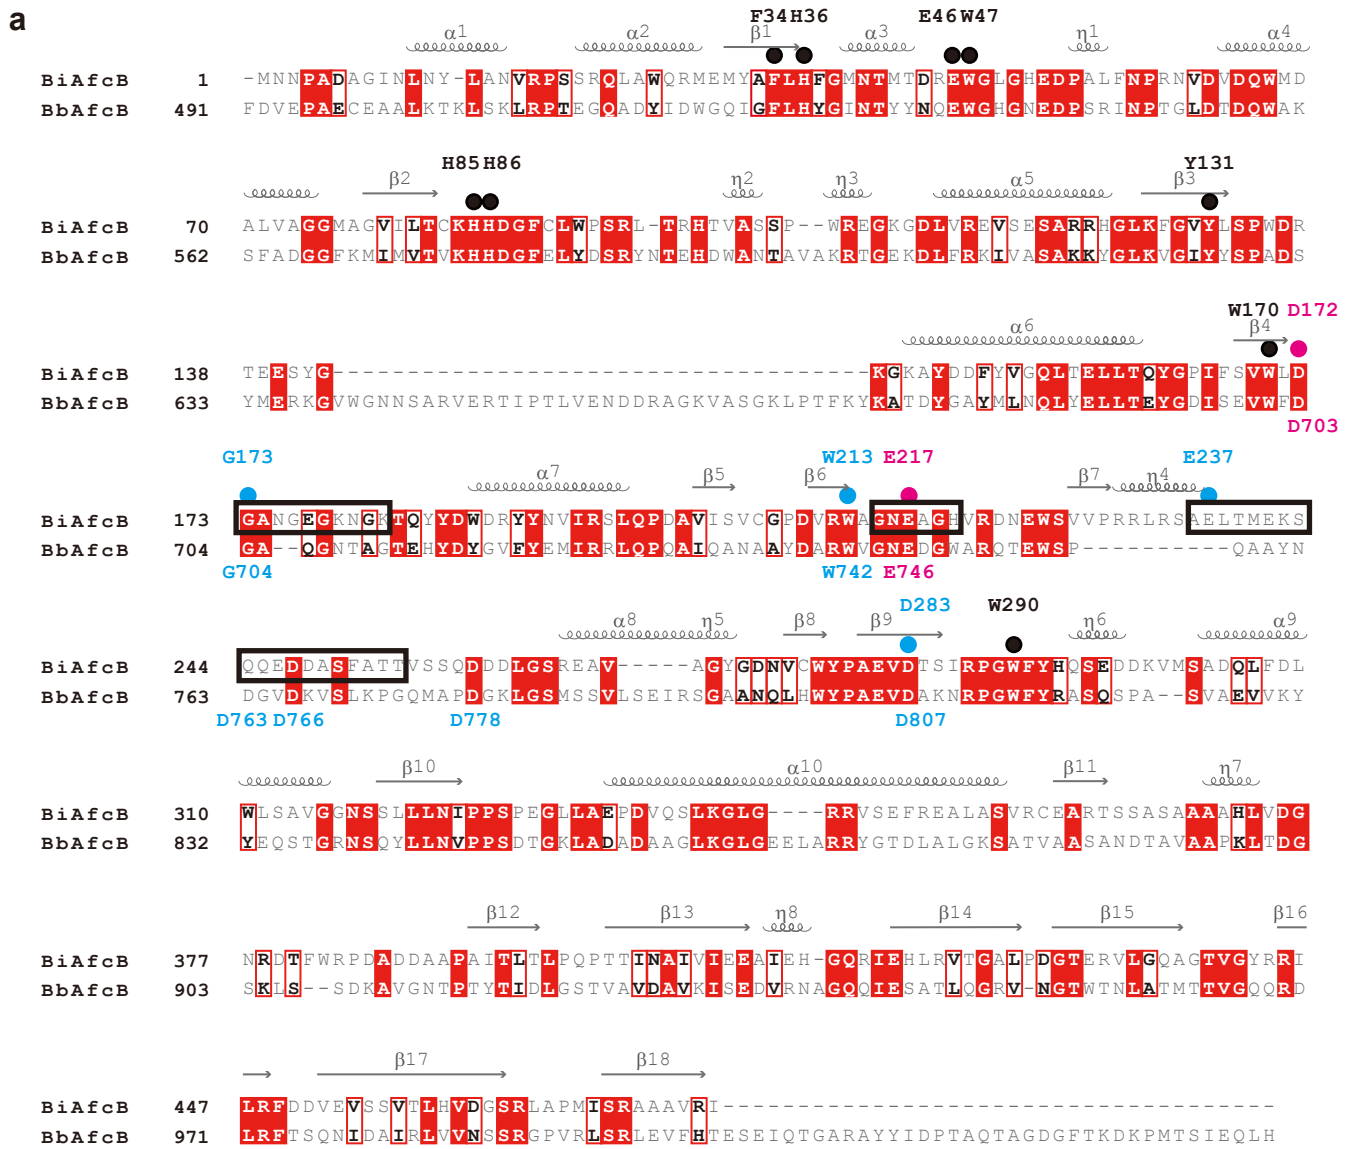

**b**

**Figure S10. (a)** Sequence alignment of *BiAfcB* and *BbAfcB*. The secondary structure of *BiAfcB* is indicated above the sequences. Two mobile loops (173-182 and 215-220) and one disordered loop (236-254) of *BiAfcB* are boxed. The residues important for catalysis, Fuc binding and Gal binding are indicated by magenta, black and cyan circles, respectively. **(b)** A structural model built for *BbAfcB* (aa 491-1039) (cyan) and the comparison of the model with *BiAfcB* (D172A/E217A-LNFP II complex) (protein in green, ligand in yellow) at the catalytic pockets (stereoview). The *BbAfcB* model was constructed using SWISS-MODEL server [Arnold, K., Bordoli, L., Kopp, J., and Schwede, T. (2006). *Bioinformatics* **22**,195-201]. The numbers of the residues are indicated.

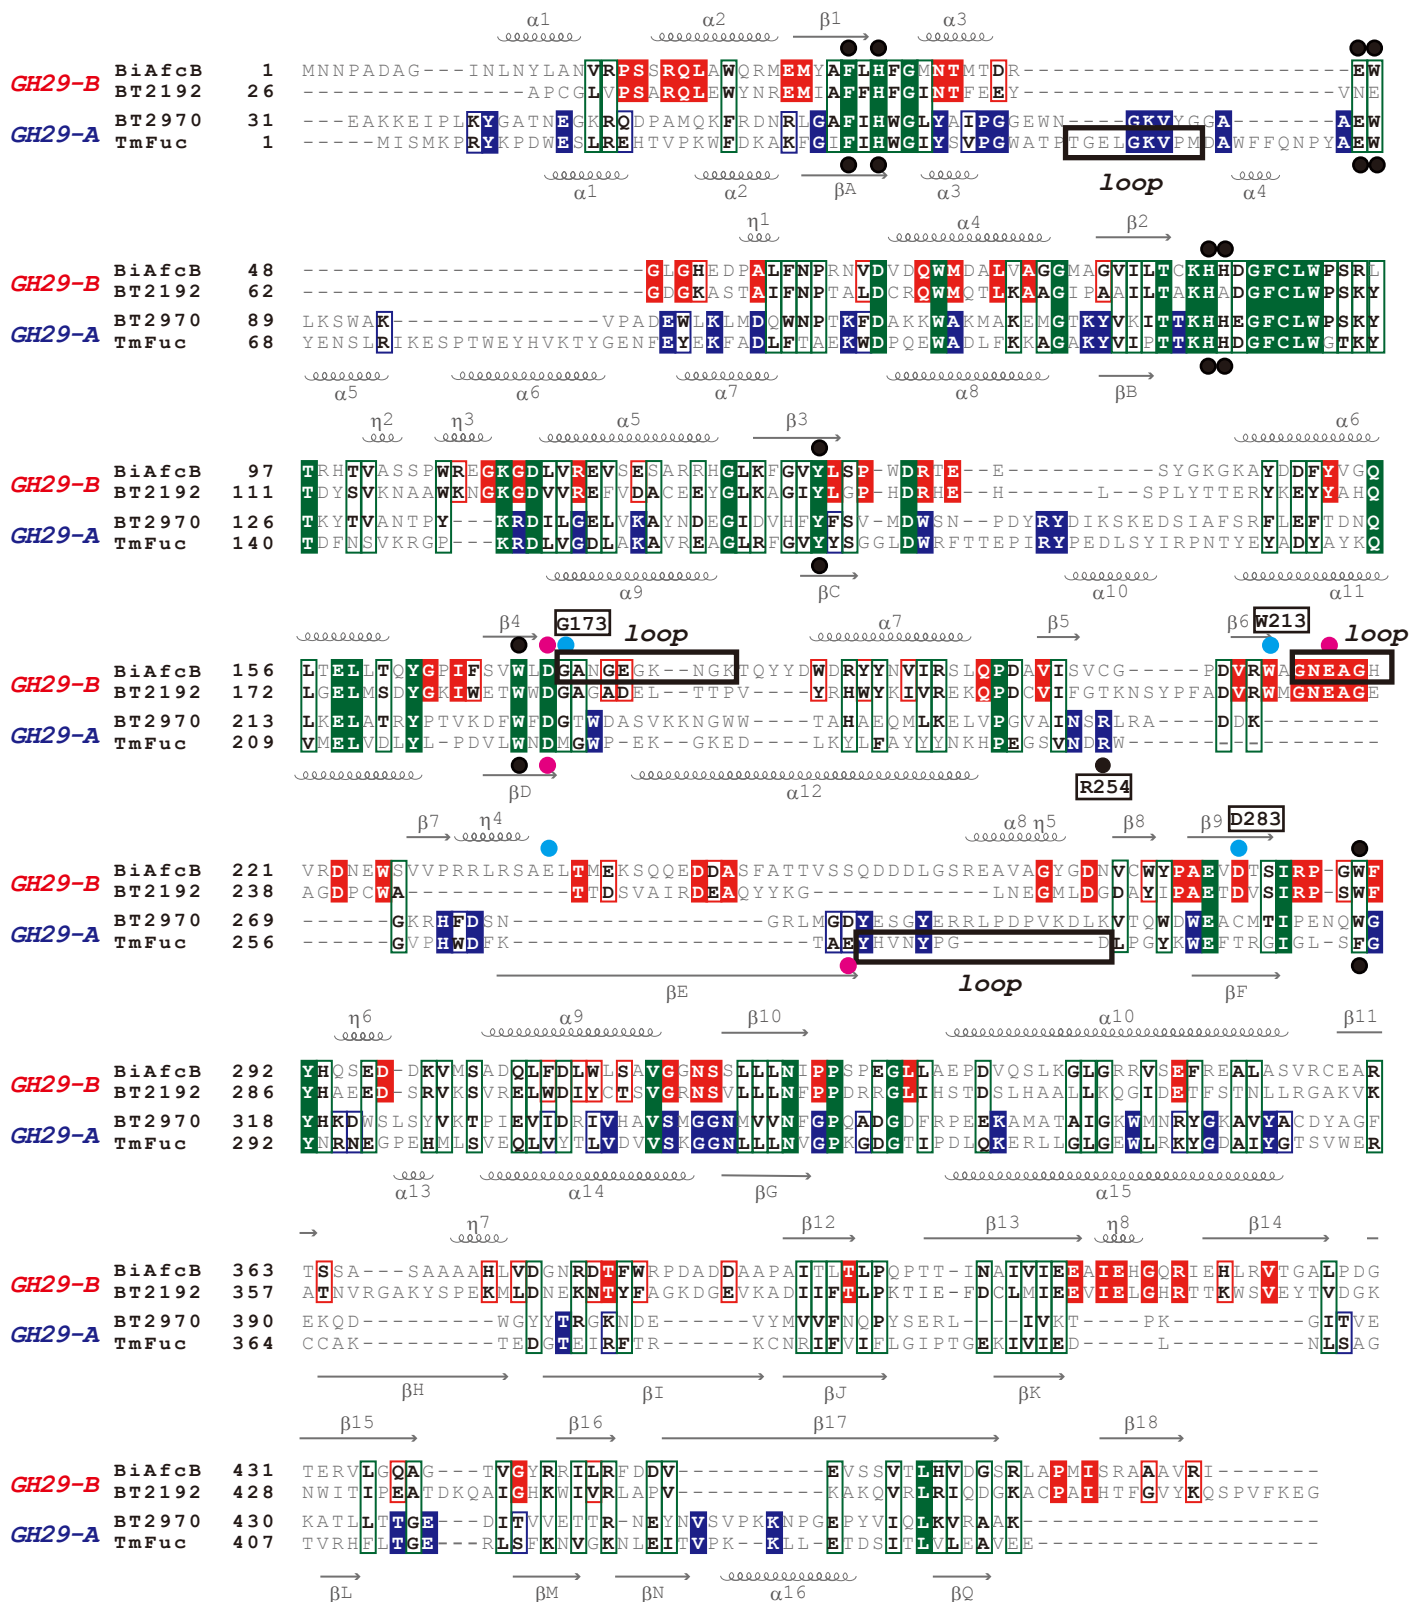

**Figure S11.** Sequence alignment of enzymatically characterized, structure-solved GH29-A and GH29-B members. The secondary structures of *BiAfcB* and *TmFuc* are indicated above and below the sequences. The residues conserved in GH29-A, GH29-B and the both are shown in blue, red and green, respectively. Two mobile loops (173-182 and 215-220 in *BiAfcB*, 47-55 and 267-274 in *TmFuc*) are boxed. The residues important for catalysis (for *BiAfcB* and *TmFuc*), Fuc-binding (for *BiAfcB* and *TmFuc*) and Gal-binding (for *BiAfcB*) are indicated by magenta, black and cyan circles, respectively. G173, W213 and D283 of *BiAfcB* and R254 of *TmFuc* are indicated. See also Figure 5 and Supplementary Figure S12.



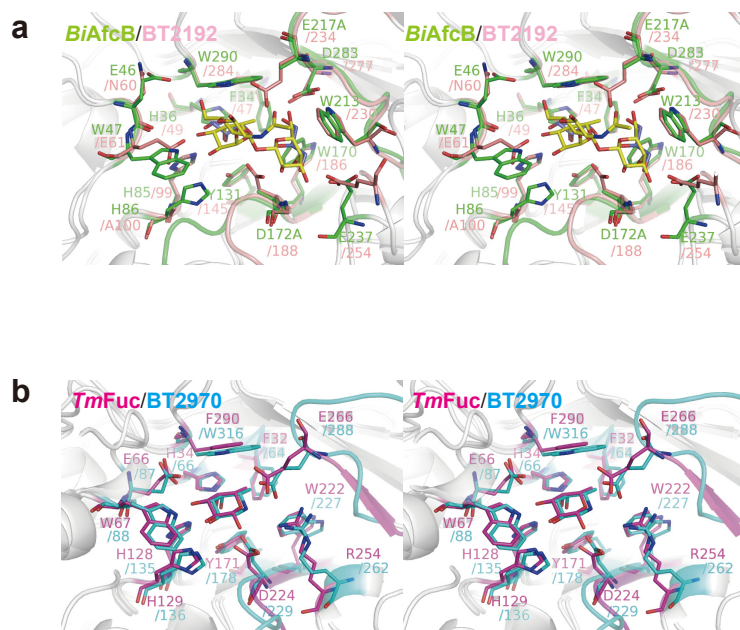

**Figure S12.** Conservation of active-site structures in the respective subfamilies. Enzymatically characterized members were used for comparison. **(a)** GH29-B: *BiAfcB* (D172A/E217A-LPFP II complex: protein in green, ligand in yellow) vs. BT2192 (glycerol complex: protein in pink, ligand in violet, PDB code 3EYP), **(b)** GH29-A: *TmFuc* (Fuc complex: magenta, PDB code 1ODU) vs. BT2970 (DFJ complex: cyan, PDB code 2XIB). The numbers of the residues are indicated. See also Figure 5 and Supplementary Figure S11.
